# Supplementary material for: A new method to make polymers with flexible main chains and photoelectric pendants for organic semiconductors
Source: Royal Society of Chemistry journal article supplement (doi:10.1039/c3py00454f), 2013-01-01
Supplement: c3py00454f.pdf [file c3py00454f.pdf]

## Electronic Supplementary Information

### **A new method to gain polymers with flexible main chains and photoelectric pendants for organic semiconductors**

Yeli Fan, Baoping Lin\*, Ying Sun, Xiaohui Gong, Hong Yang and Xueqin Zhang

*School of Chemistry and Chemical Engineering, Southeast University, Nanjing 211189, China*

Correspondence to: Baoping Lin (E-mail: [lbp@seu.edu.cn](mailto:lbp@seu.edu.cn))

1. **Fig. S1 and S2  $^1\text{H}$  NMR spectra of Ma and Mb.** **page 2**
2. **Fig. S3 Gel permeation chromatography (GPC) traces of polymers.** **page 3**
3. **Fig. S4 Thermogravimetry spectra of PFMA.** **page 4**
4. **Fig. S5 Cyclic voltammetry figures of polymers.** **page 5**
5. **UV-vis absorption spectra of PFMA-Ma and PFMA-Mb polymers in dilute  $\text{CHCl}_3$  solution and corresponding optical band gaps.** **page 6**

1. Fig. S1 and S2  $^1\text{H}$  NMR spectra of Ma and Mb.

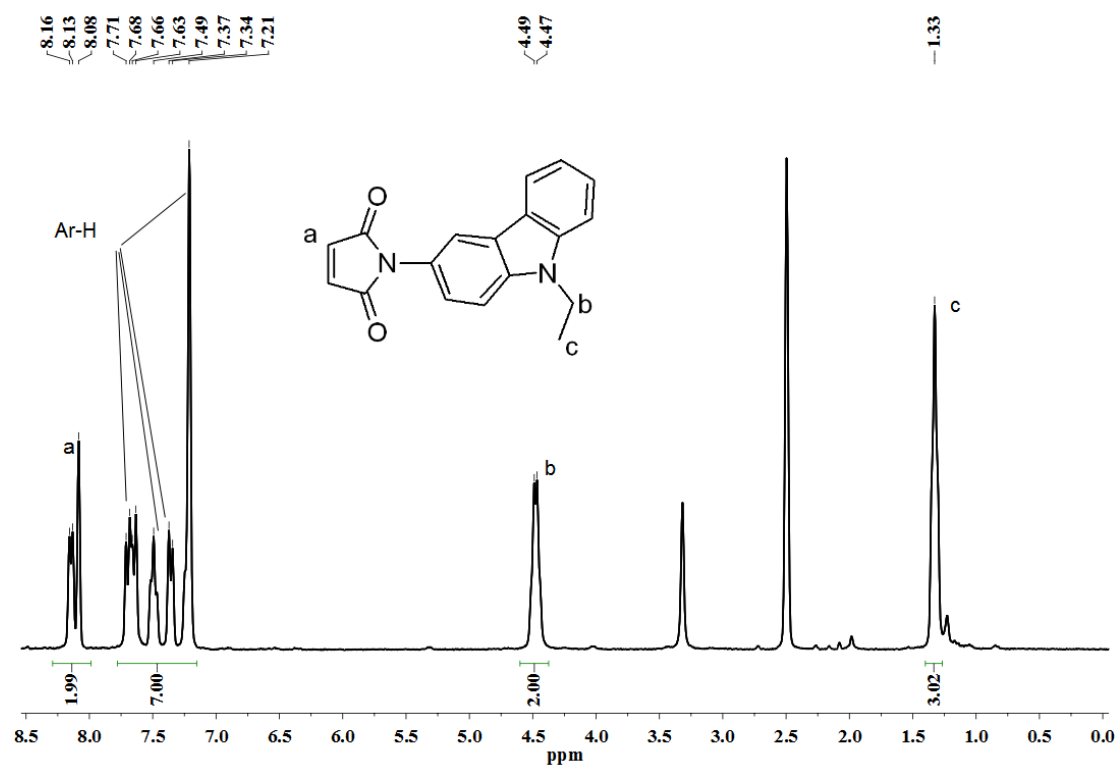

Fig. S1  $^1\text{H}$  NMR spectra of Ma.

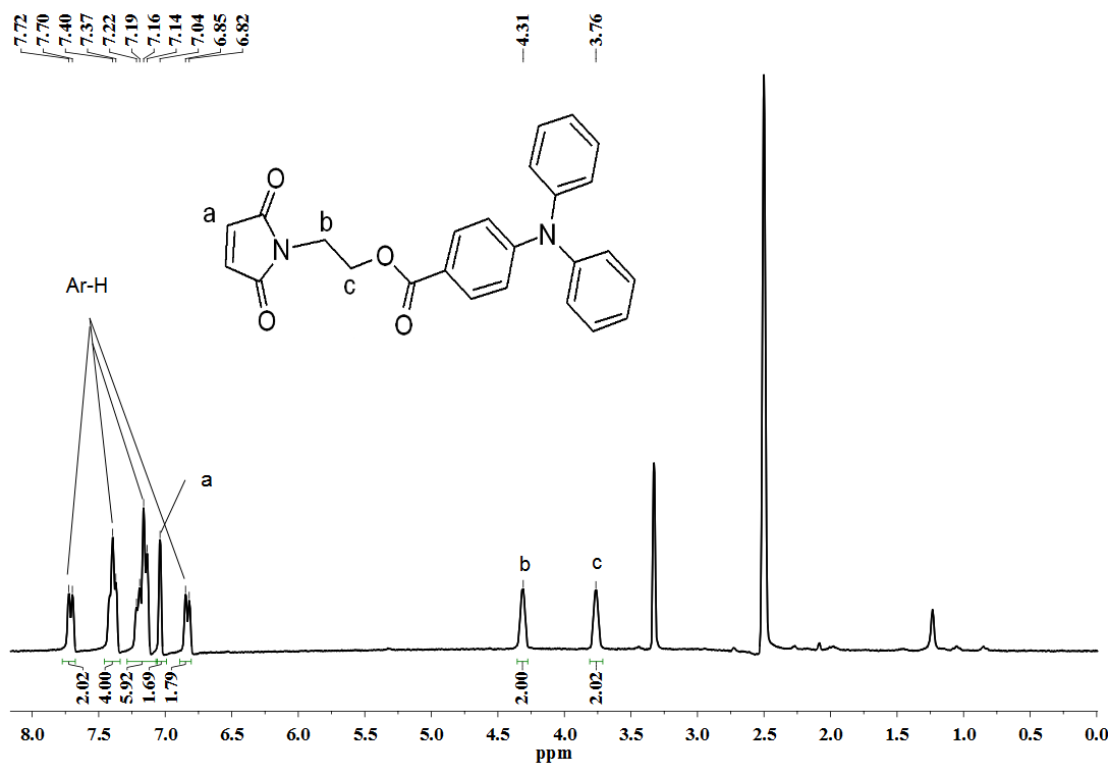

Fig. S2  $^1\text{H}$  NMR spectra of Mb.

2. Fig. S3 Gel permeation chromatography (GPC) traces of polymers.

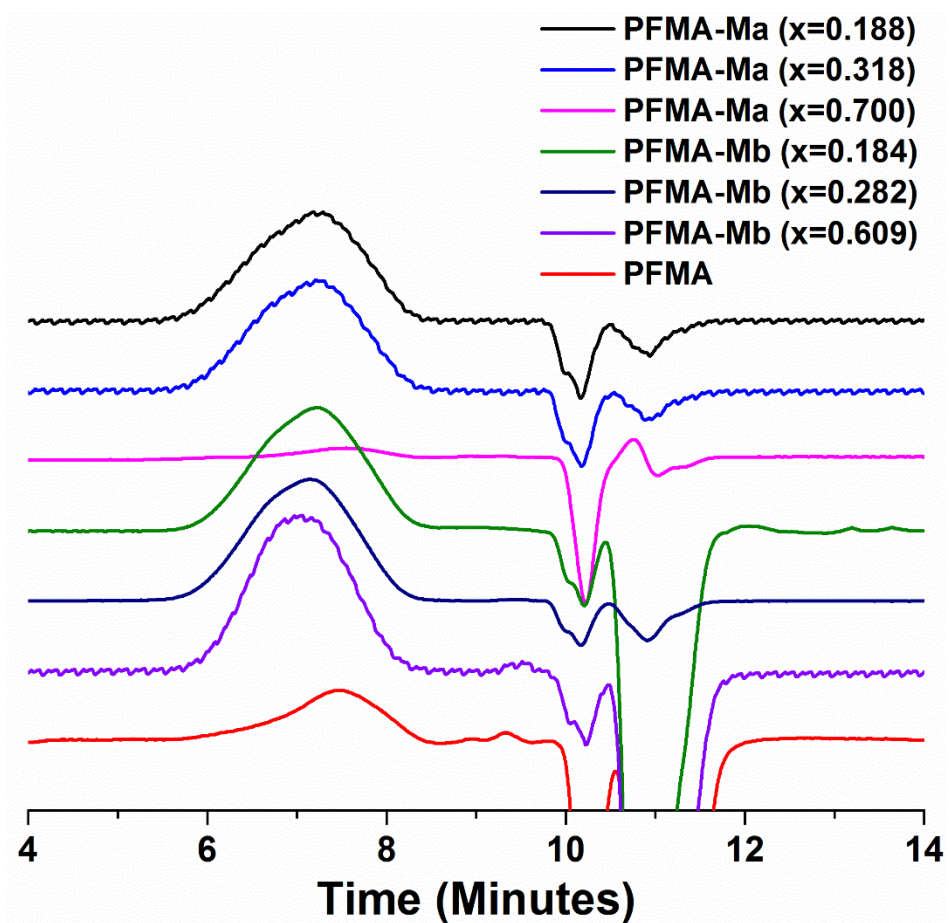

Fig. S3 Gel permeation chromatography (GPC) traces of polymers.

3. Fig. S4 Thermogravimetry spectra of PFMA.

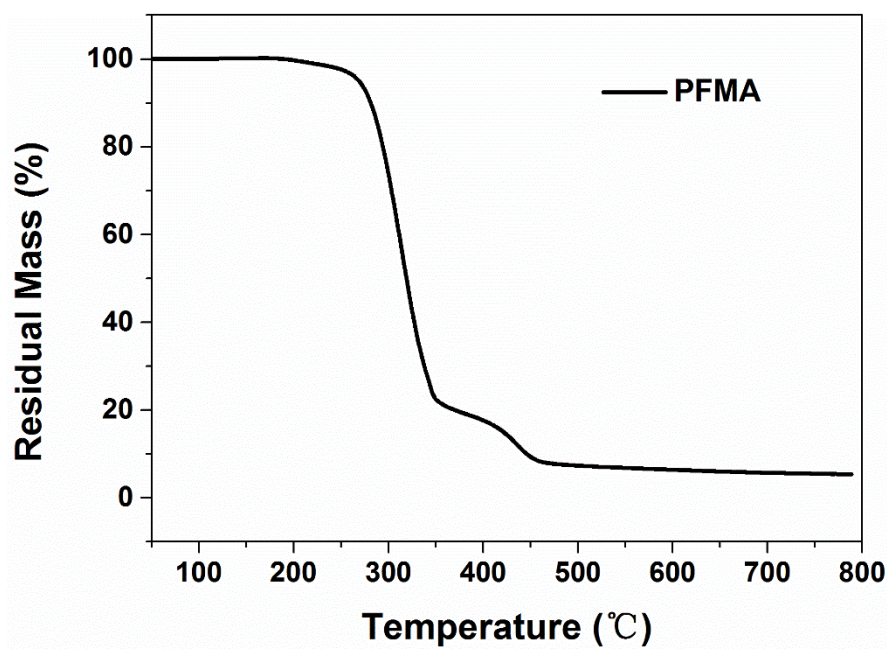

Fig. S4 Thermogravimetry spectra of PFMA.

4. Fig. S5 Cyclic voltammety figures of polymers.

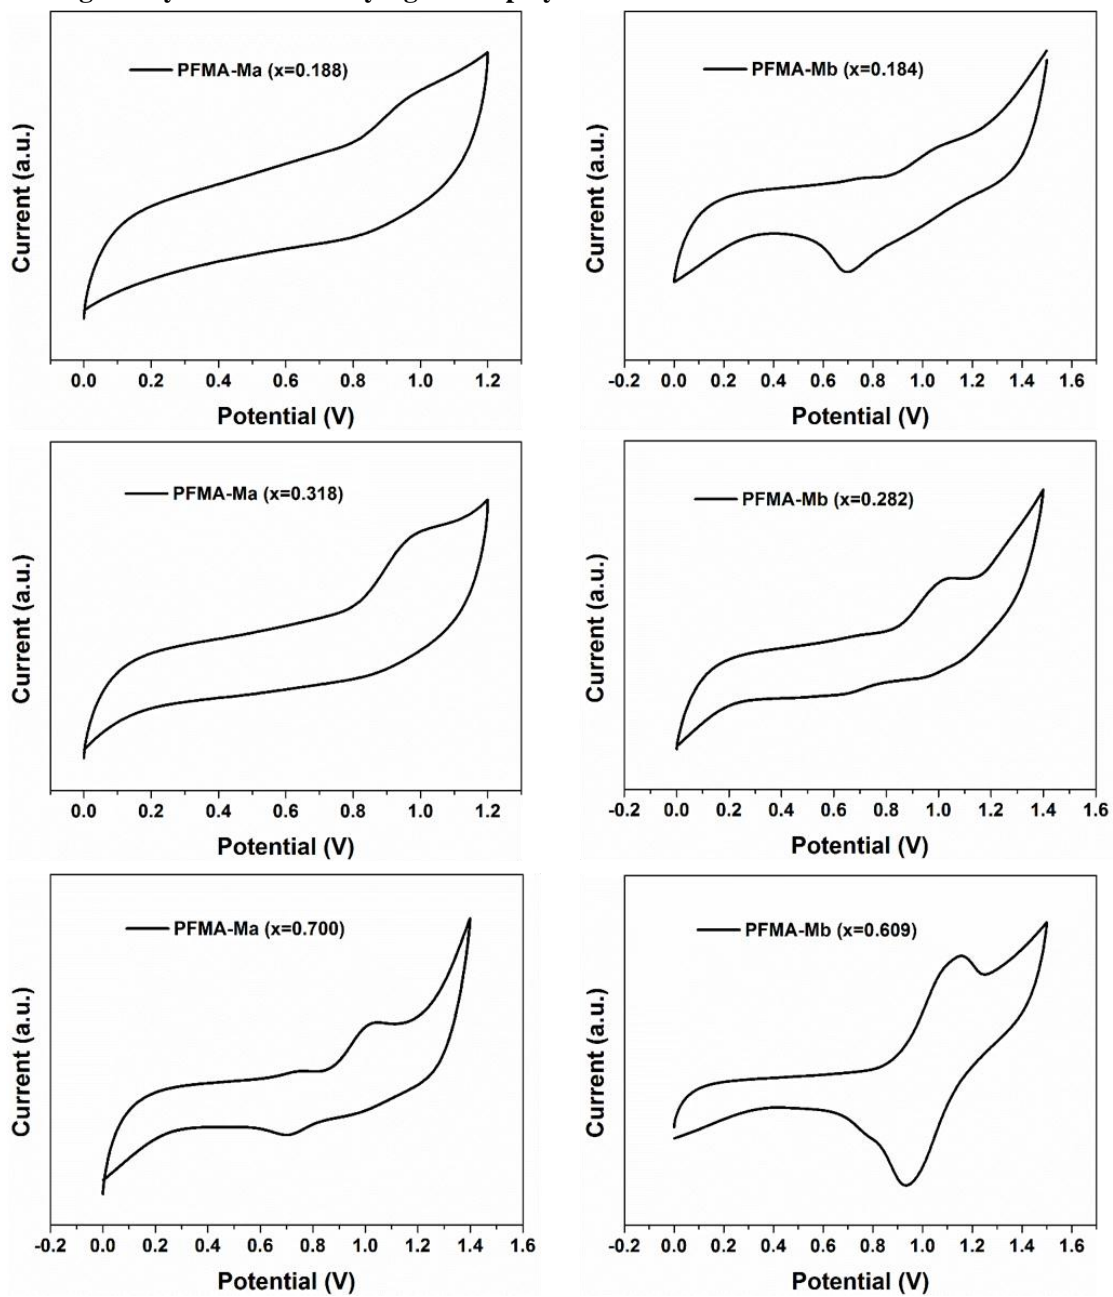

Fig. S5 Cyclic voltammety figures of polymers.

5. UV-vis absorption spectra of PFMA-Ma and PFMA-Mb polymers in dilute  $\text{CHCl}_3$  solution and corresponding optical band gaps.

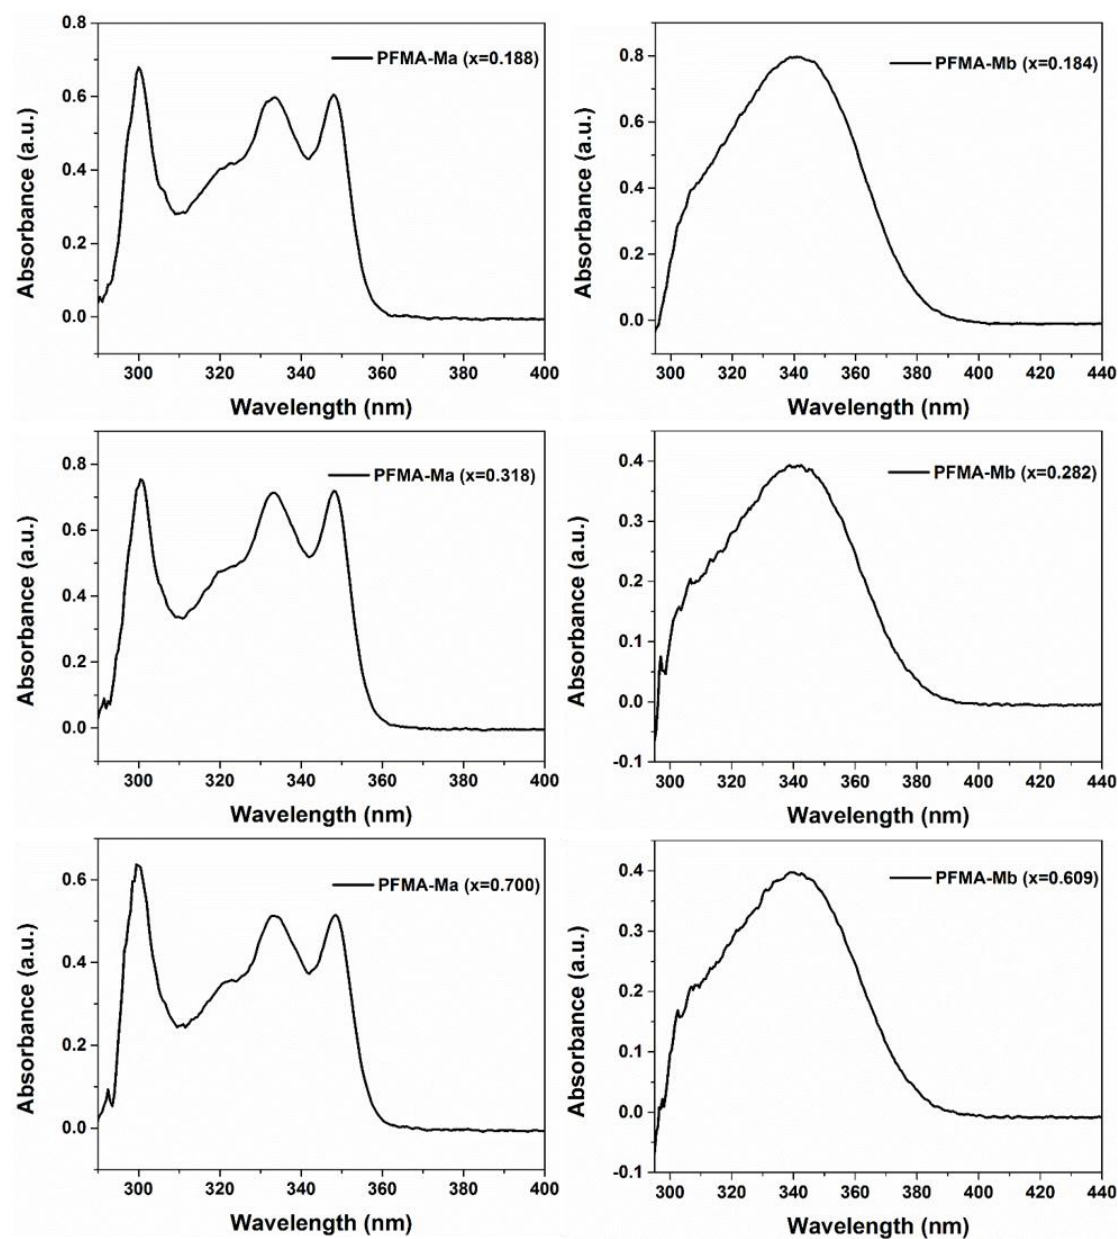

Fig. S6 UV-vis absorption spectra of PFMA-Ma and PFMA-Mb polymers in  $\text{CHCl}_3$

Table S1 Absorption edge obtained from UV-Visible spectroscopy and optical band gap

| polymer                                 | PFMA-Ma<br>( $x=0.700$ ) | PFMA-Ma<br>( $x=0.318$ ) | PFMA-Ma<br>( $x=0.188$ ) | PFMA-Mb<br>( $x=0.609$ ) | PFMA-Mb<br>( $x=0.282$ ) | PFMA-Mb<br>( $x=0.184$ ) |
|-----------------------------------------|--------------------------|--------------------------|--------------------------|--------------------------|--------------------------|--------------------------|
| absorption edge ( $\lambda/\text{nm}$ ) | 358                      | 358                      | 357                      | 378                      | 378                      | 378                      |
| optical band gap <sup>a</sup> (eV)      | 3.47                     | 3.47                     | 3.48                     | 3.28                     | 3.28                     | 3.28                     |

a. calculated as  $1241/\lambda$
